# Supplementary material for: Mechanism by which NCOA4 promotes osteoarthritis progression through iron overload-induced mitochondrial dysfunction in chondrocytes
Source: Research Square preprint supplement (doi:10.21203/rs.3.rs-8550847/v1), 2026-01-22
Supplement: Supplementary file 1 [file cd50b6a2b03fc56699e5709b.docx]

**Supplementary Materials for**

**Mechanism by which NCOA4 promotes osteoarthritis progression through iron overload-induced mitochondrial dysfunction in chondrocytes**

**Youliang Li 1**#**, Lin Gao 2**#**, Xingbang Niu 3, Tao Wu 3, Kewen Li3, Chao Li1***

**1 *Department of Joint Surgery Qinghai University Affiliated Hospital，Postal Code，810000，China***

***2Department of Orthopedics Graduate School of Clinical Medicine Qinghai University，Postal Code，810000, China***

**3*Joint Surgery Department Central Laboratory Qinghai University Affiliated Hospital，Postal Code，810000，China***

***Correspondence authors.**

***E-mail addresses:* *15500520003@163.com* (Chao Li).**

**# These authors make equal contributions to this work.**

**Supplementary Materials and Methods**

**Methods S1**

Gait Behavior Analysis Standards

Rats continuously walked on an electric treadmill for 20 seconds. When a rat refused to exercise on the treadmill, it was scored as 0 points; if the rat completed 30% of the running distance within the 20-second test period and exhibited significant gait disturbance, it was scored as 1 point; completing 60% of the running distance with moderate gait abnormalities was scored as 2 points; Rats completing 90% of the distance with only mild gait incoordination were scored as 3 points; Rats successfully completing the entire distance with normal gait were scored as 4 points.

**Methods S2**

OARSI Scoring Criteria

Pain: Assess the severity of pain, including pain during activity and at rest, as well as nighttime pain and worsening episodes. Scored on a 0-4 scale, where 0 indicates no pain and 4 indicates severe pain.

Functional Impairment: Evaluate daily mobility, including walking. Scored on a 0-4 scale, where 0 indicates no functional impairment and 4 indicates complete loss of function.

Joint Swelling: Assess the degree and extent of joint swelling. Scored 0-4, where 0 indicates no swelling and 4 indicates severe swelling.

Organic Changes: Assess joint appearance, including joint space narrowing and bone spurs. Scored 0-4, where 0 indicates no organic changes and 4 indicates severe organic changes.

Self-reported quality of life: Assess perceived quality of life, primarily focusing on physical impact. Scored 0–4, where 0 indicates no impact and 4 indicates severely impaired quality of life.
